# Supplementary material for: Estrogen Acts Through Estrogen Receptor-β to Promote Mannan-Induced Psoriasis-Like Skin Inflammation
Source: PubMed Central journal article supplement (PMC9160234; doi:10.3389/fimmu.2022.818173), 2022-05-19
Supplement: Table_1.pdf [file Table_1.pdf]

**Table 1**

| <b>Target gene</b> | <b>Direction</b> | <b>Primer sequence (5' to 3')</b> |
|--------------------|------------------|-----------------------------------|
| CEPBD              | Forward          | CCAAGCCGAGCAAGAAGC                |
|                    | Reverse          | CAGGGCGAACGGGAAACC                |
| VGLL3              | Forward          | AGGGAGACATTGGGTCAGTAG             |
|                    | Reverse          | ATTACTCCGCTGGCTCGAAAG             |
| CCL 5              | Forward          | GTGTGCCAACCCAGAGAAGAAGT           |
|                    | Reverse          | AGCAAGCAATGACAGGGAAGCT            |
| CXCL 10            | Forward          | CCTCTCTCCATCACTCCCCTTTA           |
|                    | Reverse          | TTGCTTCGGCAGTTACTTTTGTC           |
| $\beta$ -actin     | Forward          | ACCGTGAAAAGATGACCCAG              |
|                    | Reverse          | GTACGACCAGAGGCATACAG              |
| IL-6               | Forward          | GAGAAAAGAGTTGTGCAATGGC            |
|                    | Reverse          | CCAGTTTGGTAGCATCCATCAT            |
| IL-17A             | Forward          | CCCCTAAGAAACCCCCACG               |
|                    | Reverse          | TAAAGTCCACAGAAAAACAAACACG         |
| IL-17E             | Forward          | ACAGGGACTTGAATCGGGTC              |
|                    | Reverse          | TGGTAAAGTGGGACGGAGTTG             |
| IL-17F             | Forward          | GTCAGGAAGACAGCACCA                |
|                    | Reverse          | AGCCAACTTTTAGGAGCA                |
| IL-22              | Forward          | CATGCAGGAGGTGGTACCTT              |

|               |               |                        |
|---------------|---------------|------------------------|
|               | Reverse       | CAGACGCAAGCATTCTCAG    |
| IL-23-P19     | Forward       | AGCAACTTCACACCTCCCTAC  |
|               | Reverse       | ACTGCTGACTAGAACTCAGGC  |
| TNF- $\alpha$ | Forward       | ACGCTCTTCTGTCTACTGAACT |
|               | Reverse       | ATCTGAGTGTGAGGGTCTGG   |
| ER- $\alpha$  | Forward       | CCTCCCGCCTTCTACAGGT    |
|               | Reverse       | CACACGGCACAGTAGCGAG    |
| ER- $\beta$   | Forward       | CTGTGCCTCTTCTCACAAGGA  |
|               | Reverse       | TGCTCCAAGGGTAGGATGGAC  |
| GPR 30        | Forward       | ATGGATGCGACTACTCCAGC   |
|               | Reverse       | AAGAGGGCAATCACGTACTGC  |
| U6            | serial number | MQPS0000002-1-100      |
| MiR-146a-5p   | serial number | MIMAT0000158           |
| MiR-21a-5p    | serial number | MIMAT0000530           |
| MiR-210-5p    | serial number | MIMAT0000658           |
